# Supplementary material for: Transannular 1,5-hydride shift in 5-hydroxycyclooctanone: an experimental and theoretical investigation
Source: Royal Society of Chemistry journal article supplement (doi:10.1039/b708448j), 2007-01-01
Supplement: b708448j.pdf [file b708448j.pdf]

Electronic Supplementary Information

Transannular 1,5-Hydride Shift in 5-Hydroxycyclooctanone: An Experimental and Theoretical Investigation

Paul Rademacher\* and Parveen Choudhary Mohr

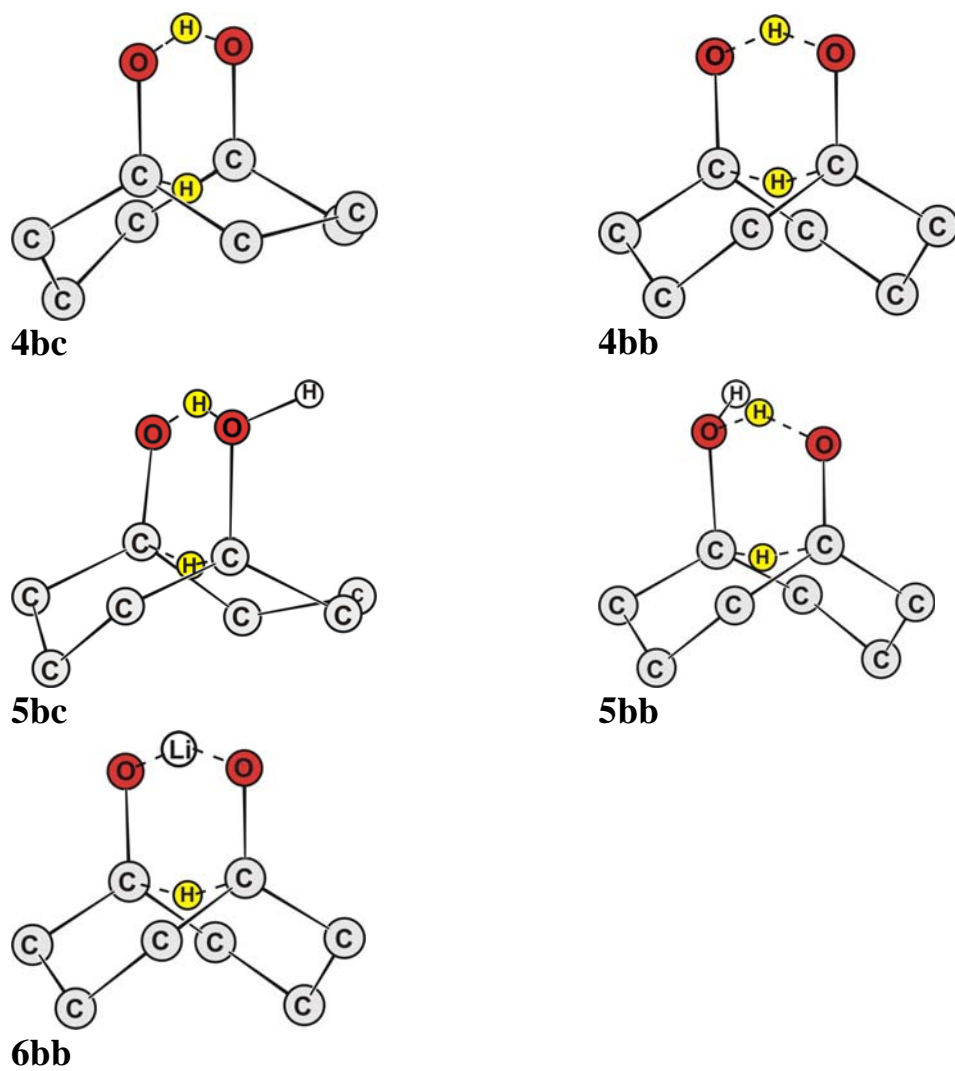

**Figure 1** Transition states for 1,5-hydride shift reaction

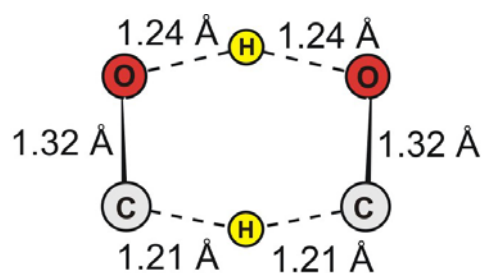

$$\angle \text{C}\cdots\text{H}\cdots\text{C} = 158^\circ$$

4bc

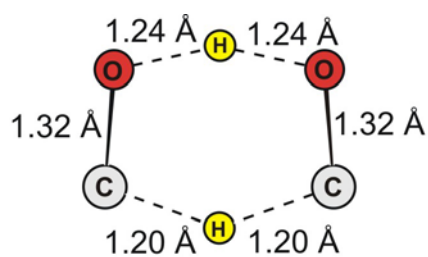

$$\angle \text{C}\cdots\text{H}\cdots\text{C} = 161^\circ$$

4bb

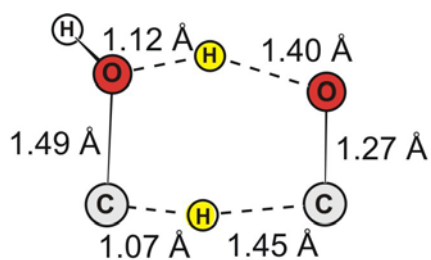

$$\angle \text{C}\cdots\text{H}\cdots\text{C} = 164^\circ$$

5bc

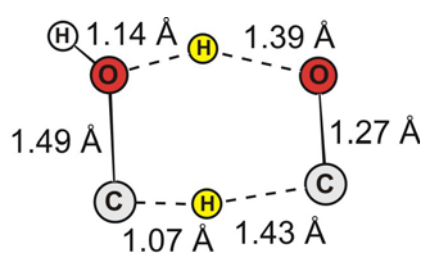

$$\angle \text{C}\cdots\text{H}\cdots\text{C} = 169^\circ$$

5bb

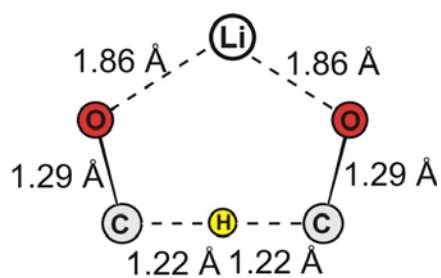

$$\angle \text{C}\cdots\text{H}\cdots\text{C} = 177^\circ$$

6bb

**Figure 2** Six-membered cyclic transition states in hydride shift reaction



$$\angle \text{C}\cdots\text{H}\cdots\text{C} = 158^\circ$$

4bc



$$\angle \text{C}\cdots\text{H}\cdots\text{C} = 161^\circ$$

4bb



$$\angle \text{C}\cdots\text{H}\cdots\text{C} = 164^\circ$$

5bc



$$\angle \text{C}\cdots\text{H}\cdots\text{C} = 169^\circ$$

5bb



$$\angle \text{C}\cdots\text{H}\cdots\text{C} = 177^\circ$$

6bb

**Figure 3** Natural charges on atoms in the six-membered cyclic transition states in hydride shift reaction

**Table ESI-1** H/D-exchange in **1HA** at ambient temperature studied by  $^1\text{H}$  NMR spectroscopy

| Acid or Base M       | Time h | Deuteration % | <b>1HA</b> <sup>a</sup> M | $k^b \text{ sec}^{-1}$ |
|----------------------|--------|---------------|---------------------------|------------------------|
| 3.4 DCl              | 0      | 0.0           | 0.64                      | $8.95 \times 10^{-7}$  |
|                      | 71     | 8.3           | 0.56                      |                        |
|                      | 162    | 33.3          | 0.32                      |                        |
|                      | 330    | 45.8          | 0.20                      |                        |
|                      | 571    | 56.3          | 0.10                      |                        |
| 7.9 DCl              | 0      | 0.0           | 0.79                      | $5.12 \times 10^{-6}$  |
|                      | 1      | 6.4           | 0.71                      |                        |
|                      | 18     | 32.5          | 0.41                      |                        |
|                      | 40     | 49.4          | 0.21                      |                        |
|                      | 63     | 55.8          | 0.13                      |                        |
|                      | 141    | 61.8          | 0.06                      |                        |
| 7.9 DCl <sup>c</sup> | 0      | 0.0           | 0.77                      | $3.73 \times 10^{-3}$  |
|                      | 0.17   | 59.9          | 0.08                      |                        |
| 12 DCl               | 0      | 9.2           | 0.57                      | $1.33 \times 10^{-4}$  |
|                      | 1      | 50.2          | 0.16                      |                        |
|                      | 4      | 59.8          | 0.07                      |                        |
| 0.65 NaOD            | 0      | 12.9          | 0.54                      | $6.45 \times 10^{-5}$  |
|                      | 1      | 34.2          | 0.33                      |                        |
|                      | 4      | 47.0          | 0.20                      |                        |
|                      | 22     | 53.6          | 0.13                      |                        |
| 1.30 NaOD            | 0      | 14.1          | 0.51                      | $1.02 \times 10^{-4}$  |
|                      | 1      | 41.3          | 0.25                      |                        |
|                      | 4      | 55.8          | 0.11                      |                        |
|                      | 23     | 56.6          | 0.10                      |                        |

<sup>a</sup> Concentration of undeuterated **1HA**, determined from Degree of Deuteration assuming that at 66.66 % **1HA** = 0.00 M. <sup>b</sup> Rate constant. <sup>c</sup> 100 °C.

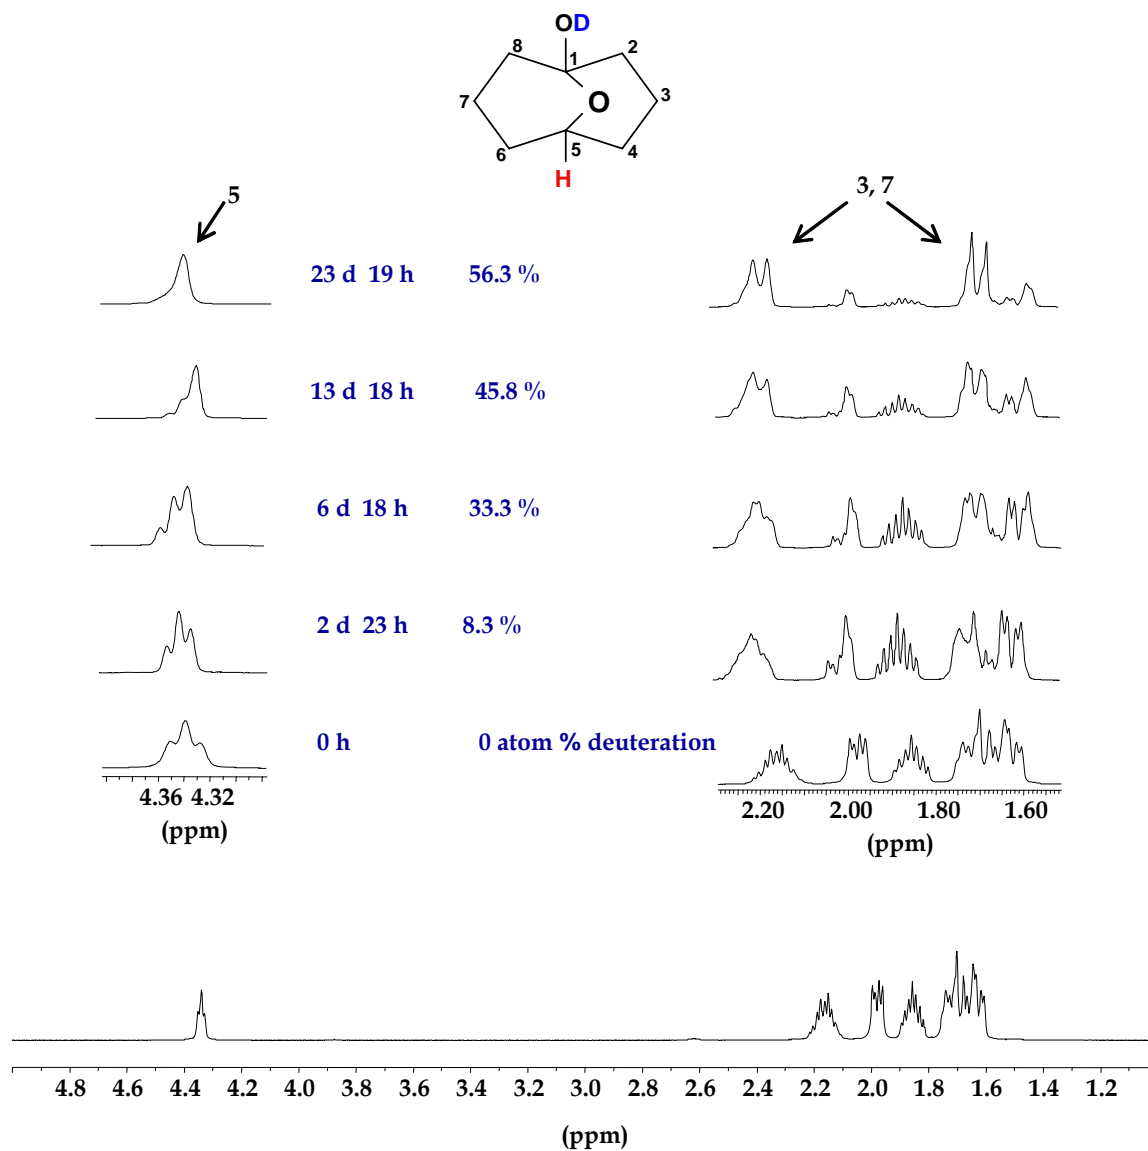

**Figure ESI-1**  $^1\text{H}$ -NMR spectra for **1HA** undergoing H/D exchange in 3.4 M DCl in  $\text{D}_2\text{O}$  at ambient temperature

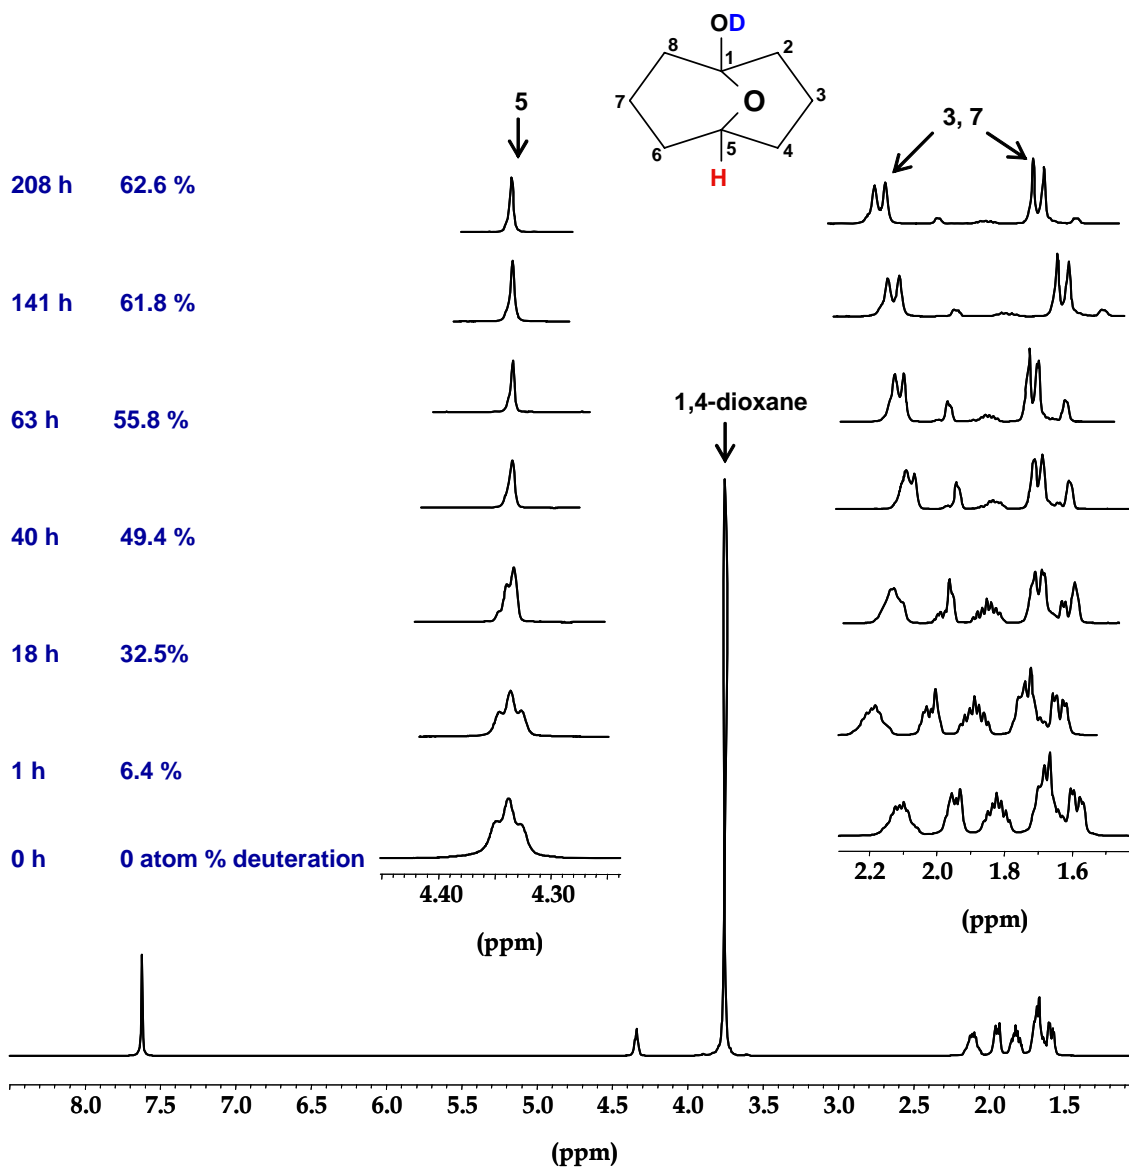

**Figure ESI-2**  $^1\text{H-NMR}$  spectra for **1HA** undergoing H/D exchange in 7.9 M DCl in  $\text{D}_2\text{O}$  at ambient temperature with dioxane as standard

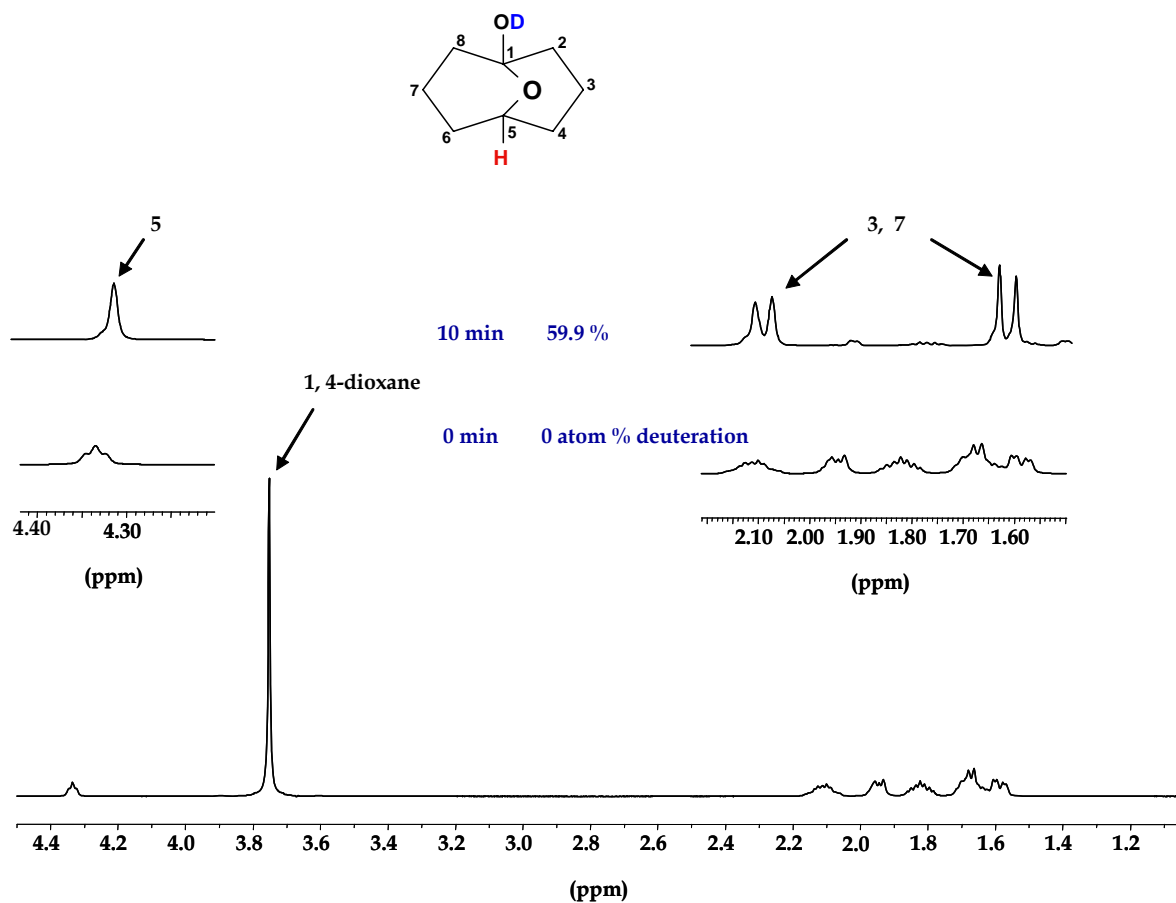

**Figure ESI-3**  $^1\text{H-NMR}$  spectra for **1HA** undergoing H/D exchange in 7.9 M DCl in  $\text{D}_2\text{O}$  at 100 °C with dioxane as standard



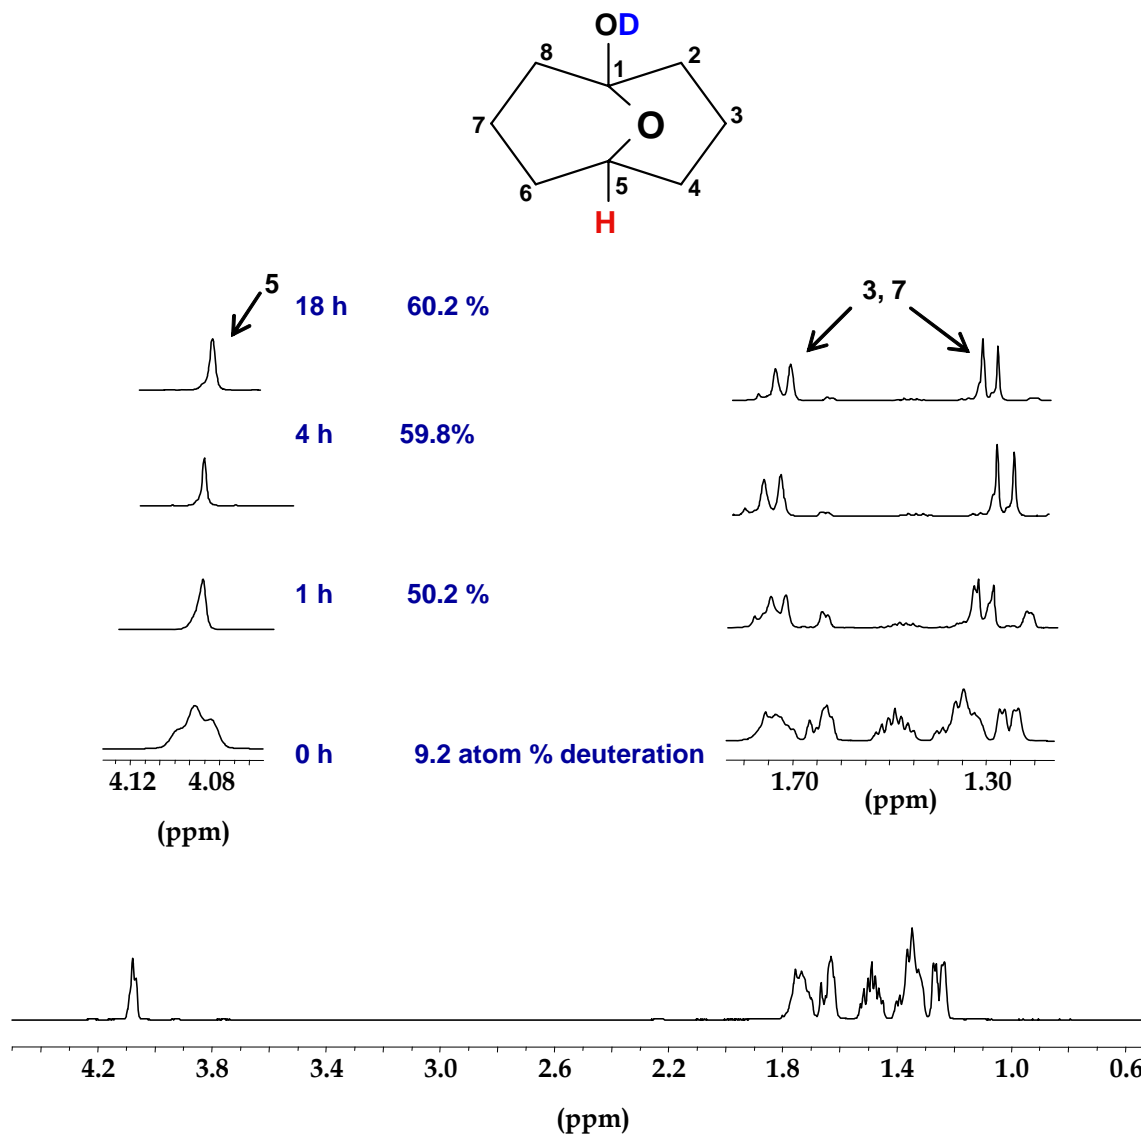

**Figure ESI-4**  $^1\text{H-NMR}$  spectra for **1HA** undergoing H/D exchange in 12.0 M DCl in  $\text{D}_2\text{O}$  at ambient temperature

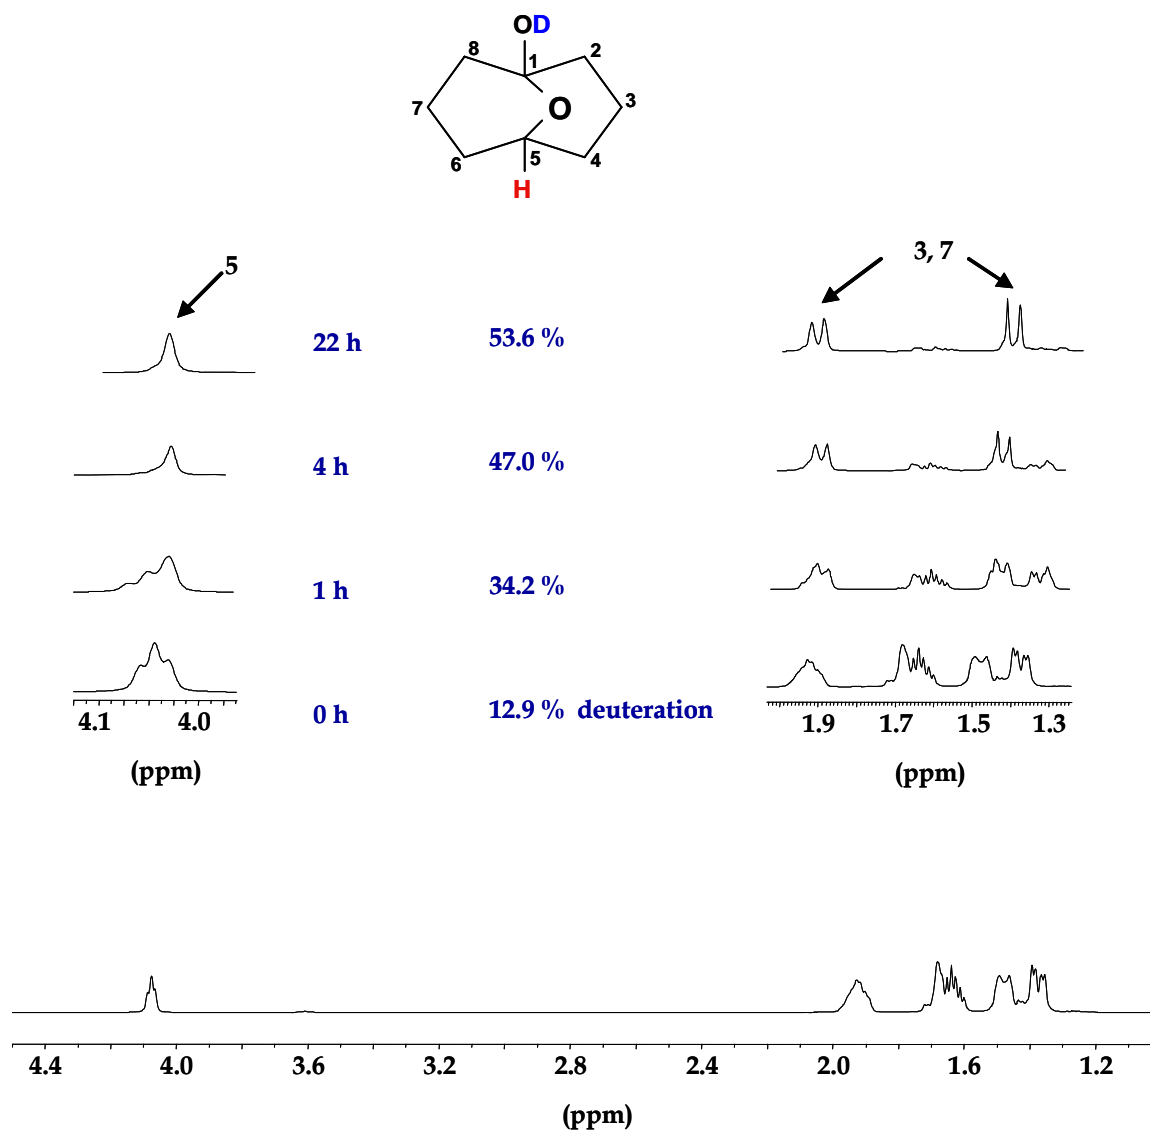

**Figure ESI-5**  $^1\text{H-NMR}$  spectra for **1HA** undergoing H/D exchange in 0.65 M NaOD in  $\text{D}_2\text{O}$  at ambient temperature

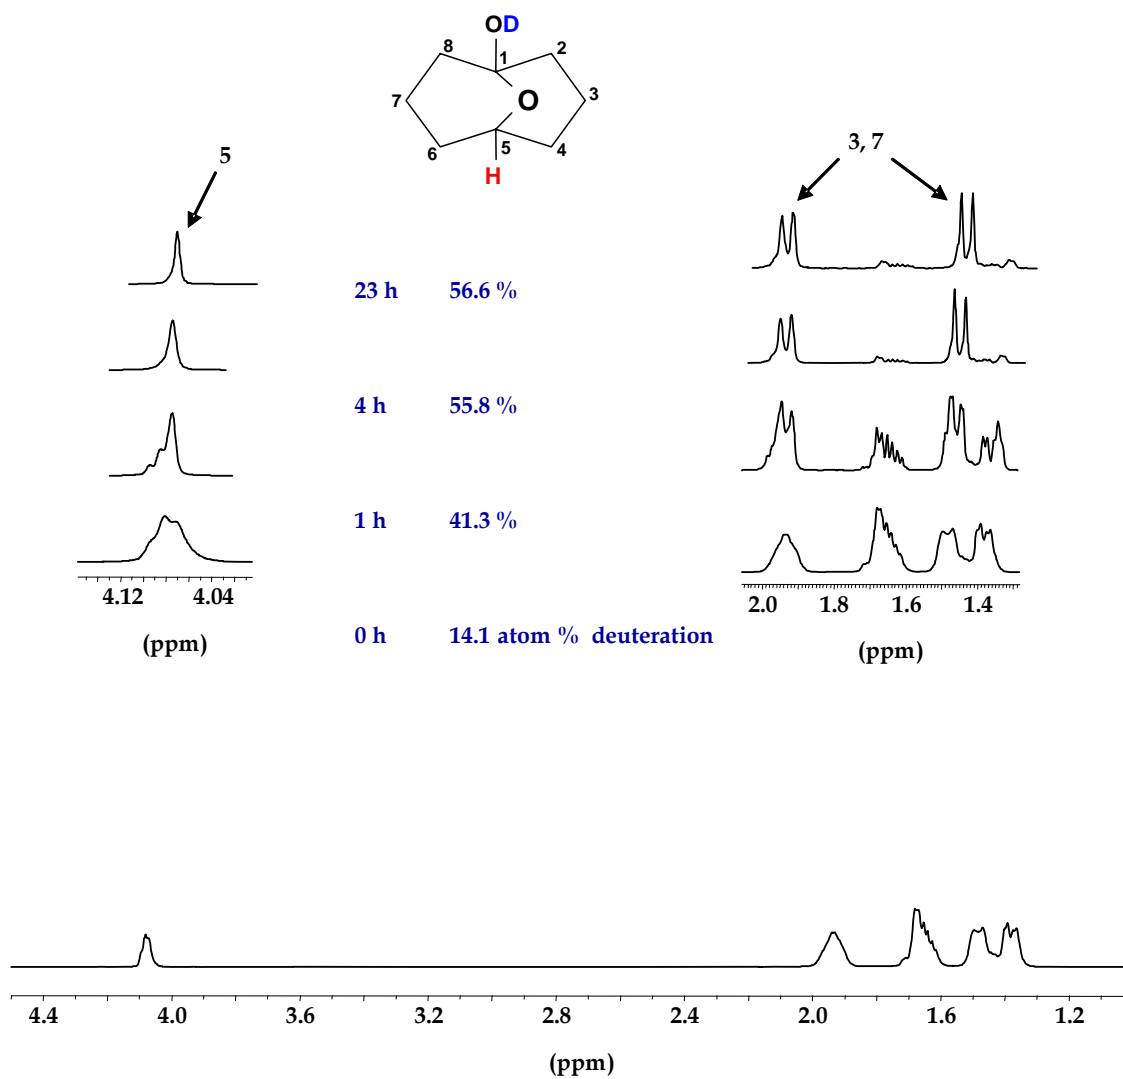

**Figure ESI-6**  $^1\text{H}$ -NMR spectra for **1HA** undergoing H/D exchange in 1.30 M NaOD in  $\text{D}_2\text{O}$  at ambient temperature

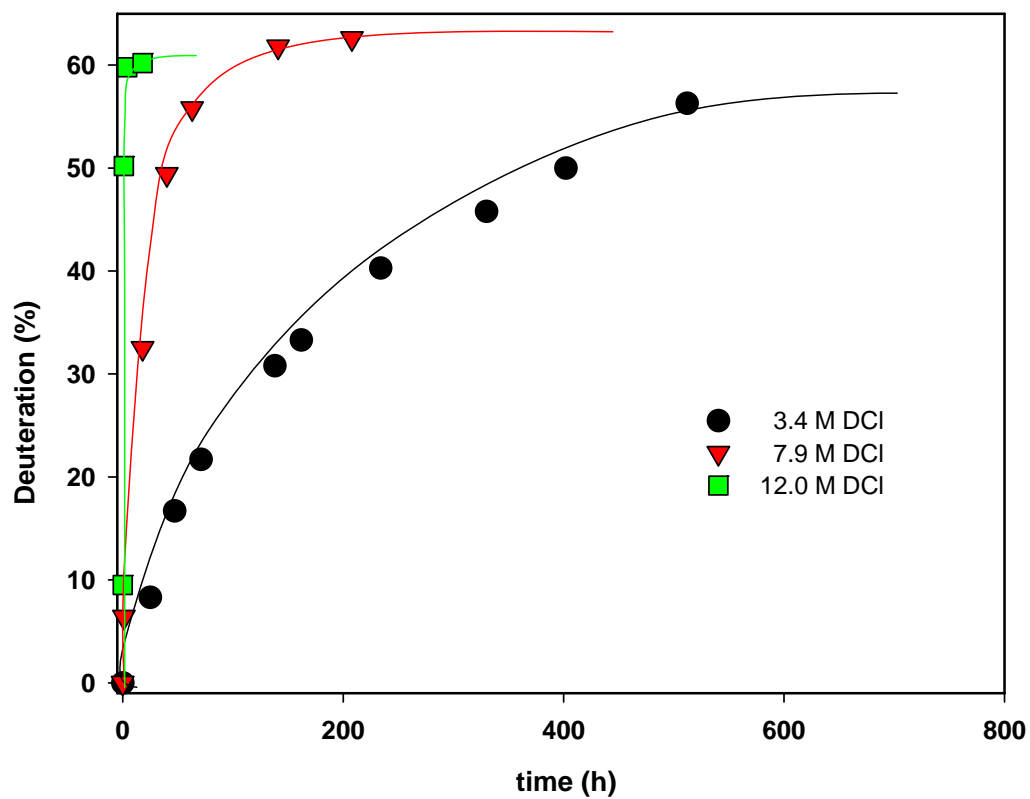

**Figure ESI-7** Deuteration of **1HA** as function of time at different concentrations of DCI in  $D_2O$  at ambient temperature

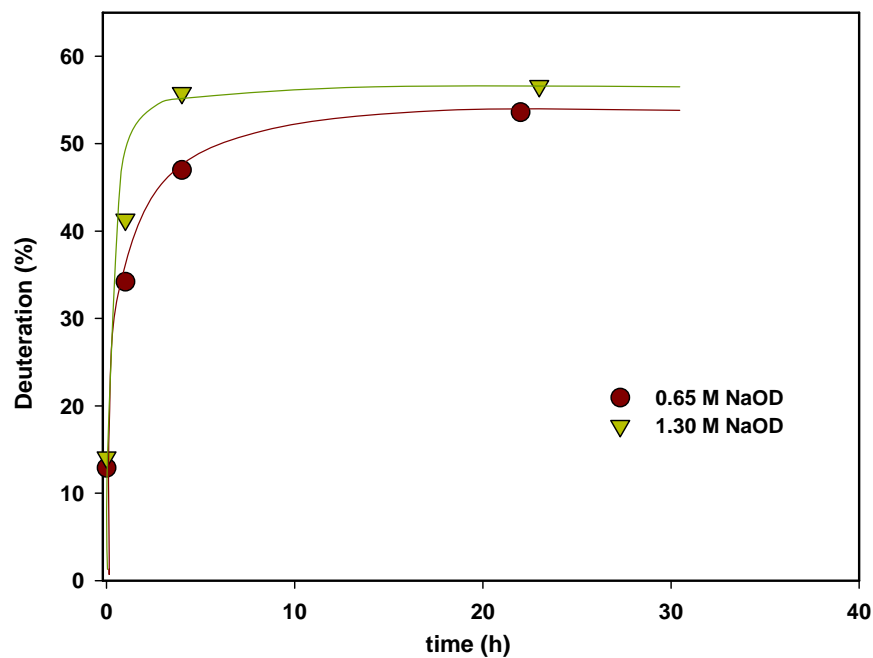

**Figure ESI-8** Deuteration of **1HA** as function of time at different concentrations of NaOD in  $D_2O$  at ambient temperature
